# Supplementary material for: Ba2Ln1−xMn2Te5 (Ln = Pr, Gd, and Yb; x = Ln vacancy): syntheses, crystal structures, optical, resistivity, and electronic structure
Source: Royal Society of Chemistry journal article supplement (doi:10.1039/d1dt00057h), 2021-01-01
Supplement: d1dt00057h1.pdf [file d1dt00057h1.pdf]

## **Ba<sub>2</sub>Ln<sub>1-x</sub>Mn<sub>2</sub>Te<sub>5</sub> (Ln = Pr, Gd, and Yb; x = Ln vacancy): syntheses, crystal structures, optical, resistivity, and electronic structure**

Gopabandhu Panigrahi,<sup>a</sup> Subhendu Jana,<sup>a</sup> Mohd Ishtiyak,<sup>a</sup> S. Narayanswamy,<sup>b</sup> Pinaki P. Bhattacharjee,<sup>b</sup> K. V. Ramanujachary,<sup>c</sup> Manish Niranjana,<sup>d</sup> and Jai Prakash<sup>a\*</sup>

<sup>a</sup>Department of Chemistry, Indian Institute of Technology Hyderabad, Kandi, Sangareddy, Telangana 502285, India

<sup>b</sup>Department of Materials Science & Metallurgical Engineering, Indian Institute of Technology Hyderabad, Kandi, Sangareddy, Telangana 502285, India

<sup>c</sup>Department of Chemistry and Biochemistry, Rowan University, Glassboro, New Jersey 08028, USA

<sup>d</sup>Department of Physics, Indian Institute of Technology Hyderabad, Kandi, Sangareddy, Telangana 502285, India

### **Electronic Supplementary Information (E.S.I.)**

The following chemicals were used as received for the syntheses of polycrystalline Ba<sub>2</sub>Ln<sub>1-x</sub>Mn<sub>2</sub>Te<sub>5</sub>: barium rod (Alfa Aesar 99+%), lanthanum (Alfa Aesar 99.9%), cerium (Alfa Aesar 99.9%), praseodymium (Alfa Aesar 99.9%), neodymium (Alfa Aesar 99.9%), gadolinium (Alfa Aesar 99.9%), ytterbium lumps (Alfa Aesar 99.9%), manganese pieces (Alfa Aesar 99.9%), and tellurium ingot (Sigma-Aldrich 99.999%). These chemicals were stored inside the argon-filled dry glove box due to their air and moisture sensitivity. All the chemical manipulations were hence performed inside the argon-filled glove box. The surface of praseodymium, neodymium, gadolinium, and ytterbium lumps was first shaved to remove the oxidized layer, and then small pieces of these metals were cut for the reactions.

### **Syntheses of polycrystalline Ba<sub>2</sub>Ln<sub>1-x</sub>Mn<sub>2</sub>Te<sub>5</sub> (Ln = La, Ce, Pr, Nd, Sm, and Yb)**

We have made attempts to synthesize the polycrystalline form of Ba<sub>2</sub>Ln<sub>1-x</sub>Mn<sub>2</sub>Te<sub>5</sub> using the sealed tube solid-state method. A stoichiometric amount of Ba, Ln, Mn, and Te were loaded inside a carbon-coated fused silica tube having 10 mm inner diameter and 12 mm outer diameter inside an Argon filled glove box. The total mass of the reactants was about 400 mg in each reaction. The fused silica tube containing the reaction mixture was first evacuated (*ca.* 10<sup>-4</sup> Torr) and sealed using a flame torch. The sealed ampoule was then placed inside a programmable muffle furnace, and the temperature was ramped up to 1273 K with a heating rate of ~78 K/h. The reaction mixture was annealed at 1273 K for 120 h. Then the furnace was switched off and allowed to cool to room temperature. The reaction tube was opened under ambient conditions to reveal a homogenous looking black product that was further ground into fine powder inside

the argon-filled glove box. The Powder X-ray diffraction data of these black polycrystalline products were collected for phase identification. The PXRD patterns were analyzed by using *Match3!* Software, and it was found that the reaction products contain the target phases in small amounts along with major secondary phases (binary and ternary compounds) (Fig SI 1).

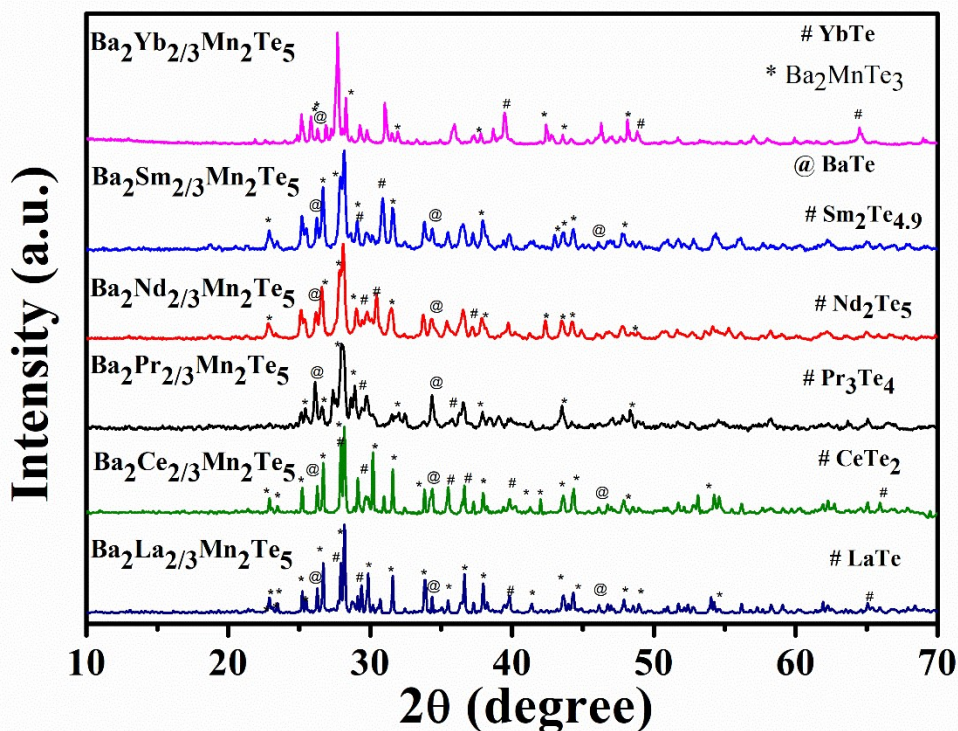

**Fig SI 1.** The PXRD patterns of the polycrystalline  $\text{Ba}_2\text{Ln}_{1-x}\text{Mn}_2\text{Te}_5$  compounds. The JCPDS numbers of Binary and ternary phases shown in the figure are given in the parentheses. (# LaTe [96 - 900 - 8664], # CeTe<sub>2</sub> [96 - 152 - 1987], # Pr<sub>3</sub>Te<sub>4</sub> [96 - 153 - 8877], # Nd<sub>2</sub>Te<sub>5</sub> [96 - 154 - 1086], # Sm<sub>2</sub>Te<sub>4.9</sub> [96 - 412 - 4105], @ BaTe [96 - 101 - 0424], \* Ba<sub>2</sub>MnTe<sub>3</sub> [96 - 722 - 1358], and # YbTe [96 - 101 - 0894]).

**Table SI1: Atomic displacement parameters ( $\text{\AA}^2$ ) for  $\text{Ba}_2\text{Ln}_{1-x}\text{Mn}_2\text{Te}_5$** 

| <b><math>\text{Ba}_2\text{Pr}_{2/3}\square_{1/3}\text{Mn}_2\text{Te}_5</math></b> |            |            |            |          |              |          |
|-----------------------------------------------------------------------------------|------------|------------|------------|----------|--------------|----------|
|                                                                                   | $U^{11}$   | $U^{22}$   | $U^{33}$   | $U^{12}$ | $U^{13}$     | $U^{23}$ |
| Ba1                                                                               | 0.0222 (3) | 0.0183 (3) | 0.0355 (3) | 0.000    | 0.0102 (2)   | 0.000    |
| Pr1                                                                               | 0.0218 (5) | 0.0188 (4) | 0.0194 (4) | 0.000    | 0.0084 (4)   | 0.000    |
| Mn1                                                                               | 0.0225 (7) | 0.0186 (6) | 0.0262 (6) | 0.000    | 0.0137 (5)   | 0.000    |
| Te1                                                                               | 0.0214 (3) | 0.0129 (3) | 0.0425 (4) | 0.000    | 0.0161 (3)   | 0.000    |
| Te2                                                                               | 0.0174 (3) | 0.0203 (3) | 0.0186 (3) | 0.000    | 0.0060 (2)   | 0.000    |
| Te3                                                                               | 0.0196 (4) | 0.0228 (4) | 0.0152 (3) | 0.000    | 0.0086 (3)   | 0.000    |
| <b><math>\text{Ba}_2\text{Gd}_{2/3}\square_{1/3}\text{Mn}_2\text{Te}_5</math></b> |            |            |            |          |              |          |
|                                                                                   | $U^{11}$   | $U^{22}$   | $U^{33}$   | $U^{12}$ | $U^{13}$     | $U^{23}$ |
| Ba1                                                                               | 0.0213(3)  | 0.0201(3)  | 0.0356 (4) | 0.000    | 0.0101 (3)   | 0.000    |
| Gd1                                                                               | 0.0199 (5) | 0.0188 (5) | 0.0191 (5) | 0.000    | 0.0076 (4)   | 0.000    |
| Mn1                                                                               | 0.0199(8)  | 0.0183(7)  | 0.0259 (8) | 0.000    | 0.0128 (6)   | 0.000    |
| Te1                                                                               | 0.0191(3)  | 0.0120 (3) | 0.0402 (4) | 0.000    | 0.0150 (3)   | 0.000    |
| Te2                                                                               | 0.0151(3)  | 0.0206 (3) | 0.0175 (3) | 0.000    | 0.0056 (2)   | 0.000    |
| Te3                                                                               | 0.0177(4)  | 0.0229(5)  | 0.0147 (4) | 0.000    | 0.0081 (3)   | 0.000    |
| <b><math>\text{Ba}_2\text{Yb}_{0.74(1)}\text{Mn}_2\text{Te}_5</math></b>          |            |            |            |          |              |          |
|                                                                                   | $U^{11}$   | $U^{22}$   | $U^{33}$   | $U^{12}$ | $U^{13}$     | $U^{23}$ |
| Ba01                                                                              | 0.0176 (2) | 0.0166 (2) | 0.0279 (2) | 0.000    | 0.00859 (16) | 0.000    |
| Yb01                                                                              | 0.0207 (3) | 0.0196 (3) | 0.0173 (3) | 0.000    | 0.0078 (2)   | 0.000    |
| Mn01                                                                              | 0.0185 (5) | 0.0177 (5) | 0.0226 (5) | 0.000    | 0.0099 (4)   | 0.000    |
| Te01                                                                              | 0.0191 (2) | 0.0149 (2) | 0.0370 (3) | 0.000    | 0.0137 (2)   | 0.000    |
| Te02                                                                              | 0.0170 (2) | 0.0231 (2) | 0.0178 (2) | 0.000    | 0.00522 (16) | 0.000    |
| Te03                                                                              | 0.0191 (3) | 0.0231 (3) | 0.0147 (3) | 0.000    | 0.0076 (2)   | 0.000    |

**Table SI2: Geometric parameters ( $^\circ$ ) for  $\text{Ba}_2\text{Pr}_{2/3}\square_{1/3}\text{Mn}_2\text{Te}_5$** 

|                                             |            |                                              |              |
|---------------------------------------------|------------|----------------------------------------------|--------------|
| Te03 <sup>i</sup> —Ba01—Te03                | 81.45 (3)  | Te02 <sup>viii</sup> —Pr01—Te02 <sup>x</sup> | 87.36 (2)    |
| Te03 <sup>i</sup> —Ba01—Te01 <sup>ii</sup>  | 133.50 (2) | Te02 <sup>ix</sup> —Pr01—Te02 <sup>x</sup>   | 180.000 (18) |
| Te03—Ba01—Te01 <sup>ii</sup>                | 80.93 (2)  | Te03 <sup>xi</sup> —Mn01—Te01 <sup>xii</sup> | 110.62 (4)   |
| Te03 <sup>i</sup> —Ba01—Te01 <sup>iii</sup> | 80.93 (2)  | Te03 <sup>xi</sup> —Mn01—Te01 <sup>xi</sup>  | 110.62 (4)   |
| Te03—Ba01—Te01 <sup>iii</sup>               | 133.50 (2) | Te01 <sup>xii</sup> —Mn01—Te01 <sup>xi</sup> | 113.94 (6)   |

|                                                |              |                                                |             |
|------------------------------------------------|--------------|------------------------------------------------|-------------|
| Te01 <sup>ii</sup> —Ba01—Te01 <sup>iii</sup>   | 80.85 (2)    | Te03 <sup>xi</sup> —Mn01—Te02                  | 99.56 (5)   |
| Te03 <sup>i</sup> —Ba01—Te02 <sup>iv</sup>     | 138.111 (16) | Te01 <sup>xii</sup> —Mn01—Te02                 | 110.60 (4)  |
| Te03—Ba01—Te02 <sup>iv</sup>                   | 138.111 (16) | Te01 <sup>xi</sup> —Mn01—Te02                  | 110.60 (4)  |
| Te01 <sup>ii</sup> —Ba01—Te02 <sup>iv</sup>    | 77.45 (2)    | Mn01 <sup>viii</sup> —Te01—Mn01 <sup>ix</sup>  | 113.94 (6)  |
| Te01 <sup>iii</sup> —Ba01—Te02 <sup>iv</sup>   | 77.45 (2)    | Mn01 <sup>viii</sup> —Te01—Pr01                | 77.75 (4)   |
| Te03 <sup>i</sup> —Ba01—Te02 <sup>ii</sup>     | 121.22 (2)   | Mn01 <sup>ix</sup> —Te01—Pr01                  | 77.75 (4)   |
| Te03—Ba01—Te02 <sup>ii</sup>                   | 71.70 (2)    | Mn01 <sup>viii</sup> —Te01—Ba01 <sup>ii</sup>  | 161.18 (3)  |
| Te01 <sup>ii</sup> —Ba01—Te02 <sup>ii</sup>    | 92.97 (2)    | Mn01 <sup>ix</sup> —Te01—Ba01 <sup>ii</sup>    | 81.91 (3)   |
| Te01 <sup>iii</sup> —Ba01—Te02 <sup>ii</sup>   | 151.52 (3)   | Pr01—Te01—Ba01 <sup>ii</sup>                   | 96.89 (3)   |
| Te02 <sup>iv</sup> —Ba01—Te02 <sup>ii</sup>    | 74.07 (2)    | Mn01 <sup>viii</sup> —Te01—Ba01 <sup>iii</sup> | 81.91 (3)   |
| Te03 <sup>i</sup> —Ba01—Te02 <sup>iii</sup>    | 71.70 (2)    | Mn01 <sup>ix</sup> —Te01—Ba01 <sup>iii</sup>   | 161.18 (3)  |
| Te03—Ba01—Te02 <sup>iii</sup>                  | 121.22 (2)   | Pr01—Te01—Ba01 <sup>iii</sup>                  | 96.89 (3)   |
| Te01 <sup>ii</sup> —Ba01—Te02 <sup>iii</sup>   | 151.52 (3)   | Ba01 <sup>ii</sup> —Te01—Ba01 <sup>iii</sup>   | 80.85 (2)   |
| Te01 <sup>iii</sup> —Ba01—Te02 <sup>iii</sup>  | 92.97 (2)    | Mn01—Te02—Pr01 <sup>xii</sup>                  | 77.55 (3)   |
| Te02 <sup>iv</sup> —Ba01—Te02 <sup>iii</sup>   | 74.07 (2)    | Mn01—Te02—Pr01 <sup>xi</sup>                   | 77.55 (3)   |
| Te02 <sup>ii</sup> —Ba01—Te02 <sup>iii</sup>   | 79.27 (2)    | Pr01 <sup>xii</sup> —Te02—Pr01 <sup>xi</sup>   | 92.64 (2)   |
| Te03 <sup>i</sup> —Ba01—Ba01 <sup>i</sup>      | 49.277 (16)  | Mn01—Te02—Ba01 <sup>xiii</sup>                 | 170.22 (4)  |
| Te03—Ba01—Ba01 <sup>i</sup>                    | 130.724 (15) | Pr01 <sup>xii</sup> —Te02—Ba01 <sup>xiii</sup> | 95.79 (2)   |
| Te01 <sup>ii</sup> —Ba01—Ba01 <sup>i</sup>     | 130.423 (12) | Pr01 <sup>xi</sup> —Te02—Ba01 <sup>xiii</sup>  | 95.79 (2)   |
| Te01 <sup>iii</sup> —Ba01—Ba01 <sup>i</sup>    | 49.577 (12)  | Mn01—Te02—Ba01 <sup>ii</sup>                   | 81.48 (3)   |
| Te02 <sup>iv</sup> —Ba01—Ba01 <sup>i</sup>     | 90.0         | Pr01 <sup>xii</sup> —Te02—Ba01 <sup>ii</sup>   | 90.149 (18) |
| Te02 <sup>ii</sup> —Ba01—Ba01 <sup>i</sup>     | 129.635 (12) | Pr01 <sup>xi</sup> —Te02—Ba01 <sup>ii</sup>    | 157.71 (2)  |
| Te02 <sup>iii</sup> —Ba01—Ba01 <sup>i</sup>    | 50.365 (12)  | Ba01 <sup>xiii</sup> —Te02—Ba01 <sup>ii</sup>  | 105.93 (2)  |
| Te03 <sup>i</sup> —Ba01—Ba01 <sup>v</sup>      | 130.724 (15) | Mn01—Te02—Ba01 <sup>iii</sup>                  | 81.48 (3)   |
| Te03—Ba01—Ba01 <sup>v</sup>                    | 49.277 (15)  | Pr01 <sup>xii</sup> —Te02—Ba01 <sup>iii</sup>  | 157.71 (2)  |
| Te01 <sup>ii</sup> —Ba01—Ba01 <sup>v</sup>     | 49.577 (12)  | Pr01 <sup>xi</sup> —Te02—Ba01 <sup>iii</sup>   | 90.149 (19) |
| Te01 <sup>iii</sup> —Ba01—Ba01 <sup>v</sup>    | 130.423 (12) | Ba01 <sup>xiii</sup> —Te02—Ba01 <sup>iii</sup> | 105.93 (2)  |
| Te02 <sup>iv</sup> —Ba01—Ba01 <sup>v</sup>     | 90.0         | Ba01 <sup>ii</sup> —Te02—Ba01 <sup>iii</sup>   | 79.27 (2)   |
| Te02 <sup>ii</sup> —Ba01—Ba01 <sup>v</sup>     | 50.365 (12)  | Mn01 <sup>ii</sup> —Te03—Mn01 <sup>ix</sup>    | 180.0       |
| Te02 <sup>iii</sup> —Ba01—Ba01 <sup>v</sup>    | 129.635 (12) | Mn01 <sup>ii</sup> —Te03—Ba01                  | 83.53 (3)   |
| Ba01 <sup>i</sup> —Ba01—Ba01 <sup>v</sup>      | 180.0        | Mn01 <sup>ix</sup> —Te03—Ba01                  | 96.47 (3)   |
| Te01 <sup>vi</sup> —Pr01—Te01                  | 180.0        | Mn01 <sup>ii</sup> —Te03—Ba01 <sup>xiv</sup>   | 96.47 (3)   |
| Te01 <sup>vi</sup> —Pr01—Te02 <sup>vii</sup>   | 90.62 (2)    | Mn01 <sup>ix</sup> —Te03—Ba01 <sup>xiv</sup>   | 83.53 (3)   |
| Te01—Pr01—Te02 <sup>vii</sup>                  | 89.38 (2)    | Ba01—Te03—Ba01 <sup>xiv</sup>                  | 98.55 (3)   |
| Te01 <sup>vi</sup> —Pr01—Te02 <sup>viii</sup>  | 89.38 (2)    | Mn01 <sup>ii</sup> —Te03—Ba01 <sup>v</sup>     | 83.53 (3)   |
| Te01—Pr01—Te02 <sup>viii</sup>                 | 90.62 (2)    | Mn01 <sup>ix</sup> —Te03—Ba01 <sup>v</sup>     | 96.47 (3)   |
| Te02 <sup>vii</sup> —Pr01—Te02 <sup>viii</sup> | 180.000 (18) | Ba01—Te03—Ba01 <sup>v</sup>                    | 81.45 (3)   |

|                                               |           |                                              |            |
|-----------------------------------------------|-----------|----------------------------------------------|------------|
| Te01 <sup>vi</sup> —Pr01—Te02 <sup>ix</sup>   | 89.38 (2) | Ba01 <sup>xiv</sup> —Te03—Ba01 <sup>v</sup>  | 180.00 (2) |
| Te01—Pr01—Te02 <sup>ix</sup>                  | 90.62 (2) | Mn01 <sup>ii</sup> —Te03—Ba01 <sup>xv</sup>  | 96.47 (3)  |
| Te02 <sup>vii</sup> —Pr01—Te02 <sup>ix</sup>  | 87.36 (2) | Mn01 <sup>ix</sup> —Te03—Ba01 <sup>xv</sup>  | 83.53 (3)  |
| Te02 <sup>viii</sup> —Pr01—Te02 <sup>ix</sup> | 92.64 (2) | Ba01—Te03—Ba01 <sup>xv</sup>                 | 180.0      |
| Te01 <sup>vi</sup> —Pr01—Te02 <sup>x</sup>    | 90.62 (2) | Ba01 <sup>xiv</sup> —Te03—Ba01 <sup>xv</sup> | 81.45 (3)  |
| Te01—Pr01—Te02 <sup>x</sup>                   | 89.38 (2) | Ba01 <sup>v</sup> —Te03—Ba01 <sup>xv</sup>   | 98.55 (3)  |
| Te02 <sup>vii</sup> —Pr01—Te02 <sup>x</sup>   | 92.64 (2) |                                              |            |

Symmetry codes: (i)  $x, y-1, z$ ; (ii)  $-x+1/2, -y+1/2, -z+1$ ; (iii)  $-x+1/2, -y-1/2, -z+1$ ; (iv)  $x, y, z+1$ ; (v)  $x, y+1, z$ ; (vi)  $-x, -y, -z$ ; (vii)  $-x+1/2, -y+1/2, -z$ ; (viii)  $x-1/2, y-1/2, z$ ; (ix)  $x-1/2, y+1/2, z$ ; (x)  $-x+1/2, -y-1/2, -z$ ; (xi)  $x+1/2, y-1/2, z$ ; (xii)  $x+1/2, y+1/2, z$ ; (xiii)  $x, y, z-1$ ; (xiv)  $-x, -y, -z+1$ ; (xv)  $-x, -y+1, -z+1$ .

**Table S13: Geometric parameters (°) for Ba<sub>2</sub>Gd<sub>2/3</sub>□<sub>1/3</sub>Mn<sub>2</sub>Te<sub>5</sub>**

|                                            |              |                                             |            |
|--------------------------------------------|--------------|---------------------------------------------|------------|
| Te3 <sup>i</sup> —Ba1—Te3                  | 81.01 (3)    | Te2 <sup>viii</sup> —Gd1—Te2 <sup>x</sup>   | 86.65 (2)  |
| Te3 <sup>i</sup> —Ba1—Te1 <sup>ii</sup>    | 133.30 (3)   | Te2 <sup>ix</sup> —Gd1—Te2 <sup>x</sup>     | 180.00 (2) |
| Te3—Ba1—Te1 <sup>ii</sup>                  | 81.17 (2)    | Te3 <sup>xi</sup> —Mn1—Te1 <sup>xii</sup>   | 111.51 (4) |
| Te3 <sup>i</sup> —Ba1—Te1 <sup>iii</sup>   | 81.17 (2)    | Te3 <sup>xi</sup> —Mn1—Te1 <sup>xi</sup>    | 111.51 (4) |
| Te3—Ba1—Te1 <sup>iii</sup>                 | 133.30 (3)   | Te1 <sup>xii</sup> —Mn1—Te1 <sup>xi</sup>   | 113.39 (6) |
| Te1 <sup>ii</sup> —Ba1—Te1 <sup>iii</sup>  | 80.51 (3)    | Te3 <sup>xi</sup> —Mn1—Te2                  | 100.01 (6) |
| Te3 <sup>i</sup> —Ba1—Te2 <sup>iv</sup>    | 138.651 (17) | Te1 <sup>xii</sup> —Mn1—Te2                 | 109.81 (4) |
| Te3—Ba1—Te2 <sup>iv</sup>                  | 138.651 (17) | Te1 <sup>xi</sup> —Mn1—Te2                  | 109.81 (4) |
| Te1 <sup>ii</sup> —Ba1—Te2 <sup>iv</sup>   | 76.24 (3)    | Mn1 <sup>viii</sup> —Te1—Mn1 <sup>ix</sup>  | 113.39 (6) |
| Te1 <sup>iii</sup> —Ba1—Te2 <sup>iv</sup>  | 76.24 (3)    | Mn1 <sup>viii</sup> —Te1—Gd1                | 78.12 (4)  |
| Te3 <sup>i</sup> —Ba1—Te2 <sup>ii</sup>    | 121.14 (3)   | Mn1 <sup>ix</sup> —Te1—Gd1                  | 78.12 (4)  |
| Te3—Ba1—Te2 <sup>ii</sup>                  | 72.04 (2)    | Mn1 <sup>viii</sup> —Te1—Ba1 <sup>ii</sup>  | 161.82 (4) |
| Te1 <sup>ii</sup> —Ba1—Te2 <sup>ii</sup>   | 93.25 (2)    | Mn1 <sup>ix</sup> —Te1—Ba1 <sup>ii</sup>    | 82.53 (3)  |
| Te1 <sup>iii</sup> —Ba1—Te2 <sup>ii</sup>  | 151.39 (3)   | Gd1—Te1—Ba1 <sup>ii</sup>                   | 97.68 (3)  |
| Te2 <sup>iv</sup> —Ba1—Te2 <sup>ii</sup>   | 75.16 (2)    | Mn1 <sup>viii</sup> —Te1—Ba1 <sup>iii</sup> | 82.53 (3)  |
| Te3 <sup>i</sup> —Ba1—Te2 <sup>iii</sup>   | 72.04 (2)    | Mn1 <sup>ix</sup> —Te1—Ba1 <sup>iii</sup>   | 161.82 (4) |
| Te3—Ba1—Te2 <sup>iii</sup>                 | 121.14 (3)   | Gd1—Te1—Ba1 <sup>iii</sup>                  | 97.68 (3)  |
| Te1 <sup>ii</sup> —Ba1—Te2 <sup>iii</sup>  | 151.39 (3)   | Ba1 <sup>ii</sup> —Te1—Ba1 <sup>iii</sup>   | 80.51 (3)  |
| Te1 <sup>iii</sup> —Ba1—Te2 <sup>iii</sup> | 93.25 (2)    | Mn1—Te2—Gd1 <sup>xii</sup>                  | 77.84 (3)  |
| Te2 <sup>iv</sup> —Ba1—Te2 <sup>iii</sup>  | 75.16 (2)    | Mn1—Te2—Gd1 <sup>xi</sup>                   | 77.84 (3)  |
| Te2 <sup>ii</sup> —Ba1—Te2 <sup>iii</sup>  | 78.91 (3)    | Gd1 <sup>xii</sup> —Te2—Gd1 <sup>xi</sup>   | 93.35 (2)  |
| Te3 <sup>i</sup> —Ba1—Ba1 <sup>i</sup>     | 49.495 (16)  | Mn1—Te2—Ba1 <sup>xiii</sup>                 | 171.99 (4) |
| Te3—Ba1—Ba1 <sup>i</sup>                   | 130.506 (16) | Gd1 <sup>xii</sup> —Te2—Ba1 <sup>xiii</sup> | 96.75 (2)  |

|                                             |              |                                             |             |
|---------------------------------------------|--------------|---------------------------------------------|-------------|
| Te1 <sup>ii</sup> —Ba1—Ba1 <sup>i</sup>     | 130.255 (13) | Gd1 <sup>xi</sup> —Te2—Ba1 <sup>xiii</sup>  | 96.75 (2)   |
| Te1 <sup>iii</sup> —Ba1—Ba1 <sup>i</sup>    | 49.744 (13)  | Mn1—Te2—Ba1 <sup>ii</sup>                   | 81.25 (3)   |
| Te2 <sup>iv</sup> —Ba1—Ba1 <sup>i</sup>     | 90.0         | Gd1 <sup>xii</sup> —Te2—Ba1 <sup>ii</sup>   | 89.999 (19) |
| Te2 <sup>ii</sup> —Ba1—Ba1 <sup>i</sup>     | 129.455 (13) | Gd1 <sup>xi</sup> —Te2—Ba1 <sup>ii</sup>    | 157.60 (3)  |
| Te2 <sup>iii</sup> —Ba1—Ba1 <sup>i</sup>    | 50.545 (13)  | Ba1 <sup>xiii</sup> —Te2—Ba1 <sup>ii</sup>  | 104.84 (2)  |
| Te3 <sup>i</sup> —Ba1—Ba1 <sup>v</sup>      | 130.506 (16) | Mn1—Te2—Ba1 <sup>iii</sup>                  | 81.25 (3)   |
| Te3—Ba1—Ba1 <sup>v</sup>                    | 49.495 (16)  | Gd1 <sup>xii</sup> —Te2—Ba1 <sup>iii</sup>  | 157.60 (3)  |
| Te1 <sup>ii</sup> —Ba1—Ba1 <sup>v</sup>     | 49.744 (13)  | Gd1 <sup>xi</sup> —Te2—Ba1 <sup>iii</sup>   | 89.999 (19) |
| Te1 <sup>iii</sup> —Ba1—Ba1 <sup>v</sup>    | 130.255 (13) | Ba1 <sup>xiii</sup> —Te2—Ba1 <sup>iii</sup> | 104.84 (2)  |
| Te2 <sup>iv</sup> —Ba1—Ba1 <sup>v</sup>     | 90.0         | Ba1 <sup>ii</sup> —Te2—Ba1 <sup>iii</sup>   | 78.91 (3)   |
| Te2 <sup>ii</sup> —Ba1—Ba1 <sup>v</sup>     | 50.545 (13)  | Mn1 <sup>ii</sup> —Te3—Mn1 <sup>ix</sup>    | 180.0       |
| Te2 <sup>iii</sup> —Ba1—Ba1 <sup>v</sup>    | 129.455 (13) | Mn1 <sup>ii</sup> —Te3—Ba1                  | 83.26 (3)   |
| Ba1 <sup>i</sup> —Ba1—Ba1 <sup>v</sup>      | 180.0        | Mn1 <sup>ix</sup> —Te3—Ba1                  | 96.74 (3)   |
| Te1—Gd1—Te1 <sup>vi</sup>                   | 180.0        | Mn1 <sup>ii</sup> —Te3—Ba1 <sup>xiv</sup>   | 96.74 (3)   |
| Te1—Gd1—Te2 <sup>vii</sup>                  | 88.77 (2)    | Mn1 <sup>ix</sup> —Te3—Ba1 <sup>xiv</sup>   | 83.26 (3)   |
| Te1 <sup>vi</sup> —Gd1—Te2 <sup>vii</sup>   | 91.23 (2)    | Ba1—Te3—Ba1 <sup>xiv</sup>                  | 98.99 (3)   |
| Te1—Gd1—Te2 <sup>viii</sup>                 | 91.23 (2)    | Mn1 <sup>ii</sup> —Te3—Ba1 <sup>v</sup>     | 83.26 (3)   |
| Te1 <sup>vi</sup> —Gd1—Te2 <sup>viii</sup>  | 88.77 (2)    | Mn1 <sup>ix</sup> —Te3—Ba1 <sup>v</sup>     | 96.74 (3)   |
| Te2 <sup>vii</sup> —Gd1—Te2 <sup>viii</sup> | 180.0        | Ba1—Te3—Ba1 <sup>v</sup>                    | 81.01 (3)   |
| Te1—Gd1—Te2 <sup>ix</sup>                   | 91.23 (2)    | Ba1 <sup>xiv</sup> —Te3—Ba1 <sup>v</sup>    | 180.0       |
| Te1 <sup>vi</sup> —Gd1—Te2 <sup>ix</sup>    | 88.77 (2)    | Mn1 <sup>ii</sup> —Te3—Ba1 <sup>xv</sup>    | 96.74 (3)   |
| Te2 <sup>vii</sup> —Gd1—Te2 <sup>ix</sup>   | 86.65 (2)    | Mn1 <sup>ix</sup> —Te3—Ba1 <sup>xv</sup>    | 83.26 (3)   |
| Te2 <sup>viii</sup> —Gd1—Te2 <sup>ix</sup>  | 93.35 (2)    | Ba1—Te3—Ba1 <sup>xv</sup>                   | 180.0       |
| Te1—Gd1—Te2 <sup>x</sup>                    | 88.77 (2)    | Ba1 <sup>xiv</sup> —Te3—Ba1 <sup>xv</sup>   | 81.01 (3)   |
| Te1 <sup>vi</sup> —Gd1—Te2 <sup>x</sup>     | 91.23 (2)    | Ba1 <sup>v</sup> —Te3—Ba1 <sup>xv</sup>     | 98.99 (3)   |
| Te2 <sup>vii</sup> —Gd1—Te2 <sup>x</sup>    | 93.35 (2)    |                                             |             |

Symmetry codes: (i)  $x, y-1, z$ ; (ii)  $-x+1/2, -y+1/2, -z+1$ ; (iii)  $-x+1/2, -y-1/2, -z+1$ ; (iv)  $x, y, z+1$ ; (v)  $x, y+1, z$ ; (vi)  $-x, -y, -z$ ; (vii)  $-x+1/2, -y+1/2, -z$ ; (viii)  $x-1/2, y-1/2, z$ ; (ix)  $x-1/2, y+1/2, z$ ; (x)  $-x+1/2, -y-1/2, -z$ ; (xi)  $x+1/2, y-1/2, z$ ; (xii)  $x+1/2, y+1/2, z$ ; (xiii)  $x, y, z-1$ ; (xiv)  $-x, -y, -z+1$ ; (xv)  $-x, -y+1, -z+1$ .

**Table SI4: Geometric parameters (°) for Ba<sub>2</sub>Yb<sub>0.74(1)</sub>Mn<sub>2</sub>Te<sub>5</sub>**

|                                               |              |                                                |              |
|-----------------------------------------------|--------------|------------------------------------------------|--------------|
| Te03 <sup>i</sup> —Ba01—Te03                  | 80.97 (3)    | Te01 <sup>x</sup> —Yb01—Mn01 <sup>vi</sup>     | 46.34 (2)    |
| Te03 <sup>i</sup> —Ba01—Te01 <sup>ii</sup>    | 133.227 (19) | Te01—Yb01—Mn01 <sup>vi</sup>                   | 133.658 (19) |
| Te03—Ba01—Te01 <sup>ii</sup>                  | 81.05 (2)    | Mn01 <sup>ix</sup> —Yb01—Mn01 <sup>vi</sup>    | 102.93 (3)   |
| Te03 <sup>i</sup> —Ba01—Te01 <sup>iii</sup>   | 81.05 (2)    | Mn01 <sup>viii</sup> —Yb01—Mn01 <sup>vi</sup>  | 77.07 (3)    |
| Te03—Ba01—Te01 <sup>iii</sup>                 | 133.227 (19) | Te02 <sup>vi</sup> —Yb01—Mn01 <sup>vii</sup>   | 133.75 (3)   |
| Te01 <sup>ii</sup> —Ba01—Te01 <sup>iii</sup>  | 80.67 (2)    | Te02 <sup>vii</sup> —Yb01—Mn01 <sup>vii</sup>  | 46.25 (3)    |
| Te03 <sup>i</sup> —Ba01—Te02 <sup>iv</sup>    | 138.534 (16) | Te02 <sup>viii</sup> —Yb01—Mn01 <sup>vii</sup> | 77.64 (2)    |
| Te03—Ba01—Te02 <sup>iv</sup>                  | 138.534 (16) | Te02 <sup>ix</sup> —Yb01—Mn01 <sup>vii</sup>   | 102.36 (2)   |
| Te01 <sup>ii</sup> —Ba01—Te02 <sup>iv</sup>   | 76.89 (2)    | Te01 <sup>x</sup> —Yb01—Mn01 <sup>vii</sup>    | 133.658 (19) |
| Te01 <sup>iii</sup> —Ba01—Te02 <sup>iv</sup>  | 76.89 (2)    | Te01—Yb01—Mn01 <sup>vii</sup>                  | 46.342 (19)  |
| Te03 <sup>i</sup> —Ba01—Te02 <sup>ii</sup>    | 121.046 (19) | Mn01 <sup>ix</sup> —Yb01—Mn01 <sup>vii</sup>   | 77.07 (3)    |
| Te03—Ba01—Te02 <sup>ii</sup>                  | 71.62 (2)    | Mn01 <sup>viii</sup> —Yb01—Mn01 <sup>vii</sup> | 102.93 (3)   |
| Te01 <sup>ii</sup> —Ba01—Te02 <sup>ii</sup>   | 93.06 (2)    | Mn01 <sup>vi</sup> —Yb01—Mn01 <sup>vii</sup>   | 180.00 (4)   |
| Te01 <sup>iii</sup> —Ba01—Te02 <sup>ii</sup>  | 151.86 (2)   | Te03 <sup>xi</sup> —Mn01—Te02                  | 99.68 (4)    |
| Te02 <sup>iv</sup> —Ba01—Te02 <sup>ii</sup>   | 74.967 (19)  | Te03 <sup>xi</sup> —Mn01—Te01 <sup>xii</sup>   | 109.80 (3)   |
| Te03 <sup>i</sup> —Ba01—Te02 <sup>iii</sup>   | 71.62 (2)    | Te02—Mn01—Te01 <sup>xii</sup>                  | 111.30 (3)   |
| Te03—Ba01—Te02 <sup>iii</sup>                 | 121.046 (19) | Te03 <sup>xi</sup> —Mn01—Te01 <sup>xi</sup>    | 109.80 (3)   |
| Te01 <sup>ii</sup> —Ba01—Te02 <sup>iii</sup>  | 151.86 (2)   | Te02—Mn01—Te01 <sup>xi</sup>                   | 111.30 (3)   |
| Te01 <sup>iii</sup> —Ba01—Te02 <sup>iii</sup> | 93.058 (19)  | Te01 <sup>xii</sup> —Mn01—Te01 <sup>xi</sup>   | 114.02 (5)   |
| Te02 <sup>iv</sup> —Ba01—Te02 <sup>iii</sup>  | 74.967 (19)  | Te03 <sup>xi</sup> —Mn01—Yb01 <sup>xi</sup>    | 129.88 (3)   |
| Te02 <sup>ii</sup> —Ba01—Te02 <sup>iii</sup>  | 79.57 (2)    | Te02—Mn01—Yb01 <sup>xi</sup>                   | 56.67 (3)    |
| Te03 <sup>i</sup> —Ba01—Ba01 <sup>i</sup>     | 49.514 (15)  | Te01 <sup>xii</sup> —Mn01—Yb01 <sup>xi</sup>   | 119.76 (4)   |
| Te03—Ba01—Ba01 <sup>i</sup>                   | 130.486 (15) | Te01 <sup>xi</sup> —Mn01—Yb01 <sup>xi</sup>    | 56.73 (3)    |
| Te01 <sup>ii</sup> —Ba01—Ba01 <sup>i</sup>    | 130.337 (11) | Te03 <sup>xi</sup> —Mn01—Yb01 <sup>xii</sup>   | 129.88 (3)   |
| Te01 <sup>iii</sup> —Ba01—Ba01 <sup>i</sup>   | 49.662 (10)  | Te02—Mn01—Yb01 <sup>xii</sup>                  | 56.67 (3)    |
| Te02 <sup>iv</sup> —Ba01—Ba01 <sup>i</sup>    | 90.0         | Te01 <sup>xii</sup> —Mn01—Yb01 <sup>xii</sup>  | 56.73 (3)    |
| Te02 <sup>ii</sup> —Ba01—Ba01 <sup>i</sup>    | 129.787 (11) | Te01 <sup>xi</sup> —Mn01—Yb01 <sup>xii</sup>   | 119.76 (4)   |
| Te02 <sup>iii</sup> —Ba01—Ba01 <sup>i</sup>   | 50.213 (10)  | Yb01 <sup>xi</sup> —Mn01—Yb01 <sup>xii</sup>   | 77.07 (3)    |
| Te03 <sup>i</sup> —Ba01—Ba01 <sup>v</sup>     | 130.486 (14) | Mn01 <sup>vii</sup> —Te01—Mn01 <sup>ix</sup>   | 114.02 (5)   |
| Te03—Ba01—Ba01 <sup>v</sup>                   | 49.514 (14)  | Mn01 <sup>vii</sup> —Te01—Yb01                 | 76.93 (3)    |
| Te01 <sup>ii</sup> —Ba01—Ba01 <sup>v</sup>    | 49.662 (11)  | Mn01 <sup>ix</sup> —Te01—Yb01                  | 76.93 (3)    |
| Te01 <sup>iii</sup> —Ba01—Ba01 <sup>v</sup>   | 130.337 (11) | Mn01 <sup>vii</sup> —Te01—Ba01 <sup>ii</sup>   | 160.62 (3)   |
| Te02 <sup>iv</sup> —Ba01—Ba01 <sup>v</sup>    | 90.0         | Mn01 <sup>ix</sup> —Te01—Ba01 <sup>ii</sup>    | 81.80 (3)    |

|                                                 |              |                                                |              |
|-------------------------------------------------|--------------|------------------------------------------------|--------------|
| Te02 <sup>ii</sup> —Ba01—Ba01 <sup>v</sup>      | 50.213 (10)  | Yb01—Te01—Ba01 <sup>ii</sup>                   | 97.05 (2)    |
| Te02 <sup>iii</sup> —Ba01—Ba01 <sup>v</sup>     | 129.787 (10) | Mn01 <sup>vii</sup> —Te01—Ba01 <sup>iii</sup>  | 81.80 (3)    |
| Ba01 <sup>i</sup> —Ba01—Ba01 <sup>v</sup>       | 180.0        | Mn01 <sup>ix</sup> —Te01—Ba01 <sup>iii</sup>   | 160.61 (3)   |
| Te02 <sup>vi</sup> —Yb01—Te02 <sup>vii</sup>    | 180.000 (14) | Yb01—Te01—Ba01 <sup>iii</sup>                  | 97.05 (2)    |
| Te02 <sup>vi</sup> —Yb01—Te02 <sup>viii</sup>   | 93.23 (2)    | Ba01 <sup>ii</sup> —Te01—Ba01 <sup>iii</sup>   | 80.68 (2)    |
| Te02 <sup>vii</sup> —Yb01—Te02 <sup>viii</sup>  | 86.77 (2)    | Mn01—Te02—Yb01 <sup>xii</sup>                  | 77.08 (2)    |
| Te02 <sup>vi</sup> —Yb01—Te02 <sup>ix</sup>     | 86.77 (2)    | Mn01—Te02—Yb01 <sup>xi</sup>                   | 77.08 (2)    |
| Te02 <sup>vii</sup> —Yb01—Te02 <sup>ix</sup>    | 93.23 (2)    | Yb01 <sup>xii</sup> —Te02—Yb01 <sup>xi</sup>   | 93.23 (2)    |
| Te02 <sup>viii</sup> —Yb01—Te02 <sup>ix</sup>   | 180.000 (14) | Mn01—Te02—Ba01 <sup>xiii</sup>                 | 170.72 (3)   |
| Te02 <sup>vi</sup> —Yb01—Te01 <sup>x</sup>      | 91.144 (19)  | Yb01 <sup>xii</sup> —Te02—Ba01 <sup>xiii</sup> | 96.650 (18)  |
| Te02 <sup>vii</sup> —Yb01—Te01 <sup>x</sup>     | 88.856 (19)  | Yb01 <sup>xi</sup> —Te02—Ba01 <sup>xiii</sup>  | 96.650 (18)  |
| Te02 <sup>viii</sup> —Yb01—Te01 <sup>x</sup>    | 91.144 (18)  | Mn01—Te02—Ba01 <sup>ii</sup>                   | 81.99 (3)    |
| Te02 <sup>ix</sup> —Yb01—Te01 <sup>x</sup>      | 88.856 (18)  | Yb01 <sup>xii</sup> —Te02—Ba01 <sup>ii</sup>   | 89.691 (18)  |
| Te02 <sup>vi</sup> —Yb01—Te01                   | 88.855 (19)  | Yb01 <sup>xi</sup> —Te02—Ba01 <sup>ii</sup>    | 157.634 (19) |
| Te02 <sup>vii</sup> —Yb01—Te01                  | 91.145 (19)  | Ba01 <sup>xiii</sup> —Te02—Ba01 <sup>ii</sup>  | 105.034 (18) |
| Te02 <sup>viii</sup> —Yb01—Te01                 | 88.855 (19)  | Mn01—Te02—Ba01 <sup>iii</sup>                  | 81.99 (3)    |
| Te02 <sup>ix</sup> —Yb01—Te01                   | 91.145 (19)  | Yb01 <sup>xii</sup> —Te02—Ba01 <sup>iii</sup>  | 157.634 (19) |
| Te01 <sup>x</sup> —Yb01—Te01                    | 180.0        | Yb01 <sup>xi</sup> —Te02—Ba01 <sup>iii</sup>   | 89.691 (18)  |
| Te02 <sup>vi</sup> —Yb01—Mn01 <sup>ix</sup>     | 77.64 (2)    | Ba01 <sup>xiii</sup> —Te02—Ba01 <sup>iii</sup> | 105.034 (19) |
| Te02 <sup>vii</sup> —Yb01—Mn01 <sup>ix</sup>    | 102.36 (2)   | Ba01 <sup>ii</sup> —Te02—Ba01 <sup>iii</sup>   | 79.57 (2)    |
| Te02 <sup>viii</sup> —Yb01—Mn01 <sup>ix</sup>   | 133.75 (3)   | Mn01 <sup>ii</sup> —Te03—Mn01 <sup>ix</sup>    | 180.0        |
| Te02 <sup>ix</sup> —Yb01—Mn01 <sup>ix</sup>     | 46.25 (3)    | Mn01 <sup>ii</sup> —Te03—Ba01                  | 83.08 (2)    |
| Te01 <sup>x</sup> —Yb01—Mn01 <sup>ix</sup>      | 133.658 (19) | Mn01 <sup>ix</sup> —Te03—Ba01                  | 96.92 (2)    |
| Te01—Yb01—Mn01 <sup>ix</sup>                    | 46.34 (2)    | Mn01 <sup>ii</sup> —Te03—Ba01 <sup>xiv</sup>   | 96.92 (3)    |
| Te02 <sup>vi</sup> —Yb01—Mn01 <sup>viii</sup>   | 102.36 (2)   | Mn01 <sup>ix</sup> —Te03—Ba01 <sup>xiv</sup>   | 83.08 (3)    |
| Te02 <sup>vii</sup> —Yb01—Mn01 <sup>viii</sup>  | 77.64 (2)    | Ba01—Te03—Ba01 <sup>xiv</sup>                  | 99.03 (3)    |
| Te02 <sup>viii</sup> —Yb01—Mn01 <sup>viii</sup> | 46.25 (3)    | Mn01 <sup>ii</sup> —Te03—Ba01 <sup>v</sup>     | 83.08 (3)    |
| Te02 <sup>ix</sup> —Yb01—Mn01 <sup>viii</sup>   | 133.75 (3)   | Mn01 <sup>ix</sup> —Te03—Ba01 <sup>v</sup>     | 96.92 (3)    |
| Te01 <sup>x</sup> —Yb01—Mn01 <sup>viii</sup>    | 46.342 (19)  | Ba01—Te03—Ba01 <sup>v</sup>                    | 80.97 (3)    |
| Te01—Yb01—Mn01 <sup>viii</sup>                  | 133.658 (19) | Ba01 <sup>xiv</sup> —Te03—Ba01 <sup>v</sup>    | 180.000 (15) |
| Mn01 <sup>ix</sup> —Yb01—Mn01 <sup>viii</sup>   | 180.00 (4)   | Mn01 <sup>ii</sup> —Te03—Ba01 <sup>xv</sup>    | 96.92 (3)    |
| Te02 <sup>vi</sup> —Yb01—Mn01 <sup>vi</sup>     | 46.25 (3)    | Mn01 <sup>ix</sup> —Te03—Ba01 <sup>xv</sup>    | 83.08 (3)    |
| Te02 <sup>vii</sup> —Yb01—Mn01 <sup>vi</sup>    | 133.75 (3)   | Ba01—Te03—Ba01 <sup>xv</sup>                   | 180.0        |
| Te02 <sup>viii</sup> —Yb01—Mn01 <sup>vi</sup>   | 102.36 (2)   | Ba01 <sup>xiv</sup> —Te03—Ba01 <sup>xv</sup>   | 80.97 (3)    |
| Te02 <sup>ix</sup> —Yb01—Mn01 <sup>vi</sup>     | 77.64 (2)    | Ba01 <sup>v</sup> —Te03—Ba01 <sup>xv</sup>     | 99.03 (3)    |

Symmetry codes: (i)  $x, y-1, z$ ; (ii)  $-x+1/2, -y+1/2, -z+1$ ; (iii)  $-x+1/2, -y-1/2, -z+1$ ; (iv)  $x, y, z+1$ ; (v)  $x,$



$y+1, z$ ; (vi)  $-x+1/2, -y+1/2, -z$ ; (vii)  $x-1/2, y-1/2, z$ ; (viii)  $-x+1/2, -y-1/2, -z$ ; (ix)  $x-1/2, y+1/2, z$ ; (x)  $-x, -y, -z$ ; (xi)  $x+1/2, y-1/2, z$ ; (xii)  $x+1/2, y+1/2, z$ ; (xiii)  $x, y, z-1$ ; (xiv)  $-x, -y, -z+1$ ; (xv)  $-x, -y+1, -z+1$ .

**Table S15** The computed lattices parameters and volume of  $\text{Ba}_2\text{Gd}_{2/3}\square_{1/3}\text{Mn}_2\text{Te}_5$ .

|             | <i>a</i> | <i>b</i> | <i>c</i> | $\alpha$ | $\beta$ | $\gamma$ | <i>Volume</i> |
|-------------|----------|----------|----------|----------|---------|----------|---------------|
| <b>Cal.</b> | 15.283   | 4.556    | 10.284   | 89.993   | 114.9   | 90.013   | 649.73        |
| <b>Exp.</b> | 15.246   | 4.548    | 10.688   | 90.0     | 117.2   | 90.0     | 659.14        |

**Reference:**

1 Match! - Phase Analysis using Powder Diffraction, <https://www.crystalimpact.de/match/>, (accessed February 16, 2021).
